# Supplementary material for: Benchmarking GOCART-2G in the Goddard Earth Observing System (GEOS)
Source: Copernicus journal article supplement (doi:10.5194/gmd-17-1443-2024), 2024-02-16
Supplement: Supplementary file 1 [file gmd-17-1443-2024-supplement.pdf]

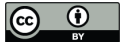

*Supplement of*

## **Benchmarking GOCART-2G in the Goddard Earth Observing System (GEOS)**

**Allison B. Collow et al.**

*Correspondence to:* Allison B. Collow ([allison.collow@nasa.gov](mailto:allison.collow@nasa.gov))

The copyright of individual parts of the supplement might differ from the article licence.

## **S1. Technical Details for Updates in GOCART-2G**

### **S1.1 Implementation of Primary Organic Aerosol**

Beginning with GOCART-2G, a distinction is made between “weakly-absorbing” anthropogenic and “absorbing” (also referred to as “brown”) biomass burning organic aerosol. Anthropogenic emissions of organic carbon, which are emitted based on CEDS, are solely considered to be “non-absorbing” organic carbon, with spectral optical properties that follow the OPAC database and are as in Chin et al. (2002) and Colarco et al. (2010). Biomass burning emissions of organic carbon from the Quick Fire Emissions Dataset (QFED) are considered absorbing “brown” carbon and assigned optical properties that have spectrally varying absorption at wavelengths shorter than 550 nm as described in Colarco et al. (2017). This distinction was found in Colarco et al. (2017) to improve the comparison of the absorbing aerosol-sensitive aerosol index between the model and data retrieved from the Ozone Monitoring Instrument (OMI) onboard the NASA Aura spacecraft. The optical properties between our absorbing and non-absorbing organic aerosol components are identical at wavelengths equal to and greater than 550 nm and treated by identical chemical and loss processes in the model.

### **S1.2 Implementation of Secondary Organic Aerosol**

A simplified SOA mechanism is employed that scales VOC emissions in terms of carbon monoxide (CO) emissions from anthropogenic and biomass sources. Following Kim et al. (2015) we assume production of anthropogenic VOC at a rate of  $0.069 \text{ g (g CO)}^{-1}$  and biomass burning VOC at a rate of  $0.013 \text{ g (g CO)}^{-1}$ . The VOC tracers are advected and assumed to convert to SOA via reaction with the prescribed MERRA-2 GMI OH fields with a rate constant of  $1.25 \times 10^{-11} \text{ cm}^3 \text{ molecule}^{-1} \text{ sec}^{-1}$  (Hodzic and Jimenez, 2011). The SOA produced is apportioned to the hydrophilic modes of organic (anthropogenic) and brown (biomass burning) carbon. Biogenic VOCs, including isoprene, monoterpene, and other terpenes are provided from the Model of Emissions of Gases and Aerosols from Nature (MEGAN; Guenther et al., 2012) and enter the model through the Harvard–NASA Emission Component software (HEMCO, Keller et al., 2014) and are assigned to the hydrophilic mode of the organic carbon component. Unlike anthropogenic and biomass burning SOA that are produced in the air via the reaction of VOCs and OH, biogenic SOA is produced by scaling MEGAN emitted VOCs at the point of emission.

### **S1.3 Implementation of Stratospheric Sulphate Aerosol**

An optional simplified stratospheric sulphate mechanism is implemented following the mechanism described in English et al. (2011). A tracer for carbonyl sulphide (OCS) is added to the model, with a prescribed surface mixing ratio boundary condition of 490 ppt<sub>v</sub>, and is transported by the model such that chemistry can occur in the stratosphere OCS is largely inert in the troposphere and the model has been spun up so that a well-mixed distribution is achieved. Photochemical destruction of OCS is managed by the stratospheric chemistry package StratChem described in Nielsen et al. (2017). The reactions considered include binary consumption of OCS by OH and atomic oxygen,  $\text{O}(^3\text{P})$ , and photolytic destruction of OCS (the dominant process), using rate constants from Sander et al. (2011). The sulphur is assumed oxidized to  $\text{SO}_2$  and then passed to GOCART, which computes the sulphate aerosol production using the same series of reactions as above for the tropospheric sulphate aerosol production. This mechanism provides us a simplified representation of the naturally occurring background stratospheric sulphate. While this mechanism is included in the benchmark experiment analysed in Section 4, it is currently not intended for use in an operational system like GEOS FP as it is computationally expensive.

### **S1.4 Code Refactoring**

GOCART has been split into its own repository (<https://github.com/GEOS-ESM/GOCART.git>) with specific low-level interfaces that do not depend on the Earth System Model Framework (ESMF, <https://earthsystemmodeling.org>) and are independent of the overall GEOS architecture. This allows for code to be effectively shared with external organizations. Performance was enhanced through optimization of settling and nitrate chemistry parameterizations, eliminating extraneous calculations, and removing known bugs. The other code refactoring consisted of eliminating non-standard Fortran, eliminating redundant and legacy constructs, reducing duplicated logic within and across components, implementing cleaner component resource files, improving procedure and variable names in the source code to make the intent obvious to users and developers, and splitting large procedures with well-defined responsibilities.

A large component of the refactoring involved more widespread adoption of the ESMF within the parent GOCART-2G component. Improved flexibility within the code is essential for future development of GOCART-2G within GEOS. Carbon, sulphate, nitrate, sea salt, and dust, now have their own ESMF components and can instantiate multiple active and/or passive instances at one time; an active instance participates in the physical coupling with the host model. For example, carbonaceous aerosol is one of GOCART-2G's children and black, brown, and organic carbon are each run as an active instance of the carbonaceous aerosol component. This means that the model is provided with characteristics of each carbon species, including optics, density, particle radius, and the fraction that enters as hydrophobic, and black, brown, and organic carbon utilize the same code to perform process-related calculations, thus eliminating duplicated code. An example of a passive instance that could be run using the same methodology would be to track and provide diagnostics for the portion of a species from a specific emission source, such as sulphate formed from in response to volcanic emissions.

## S2. Supplemental Figures

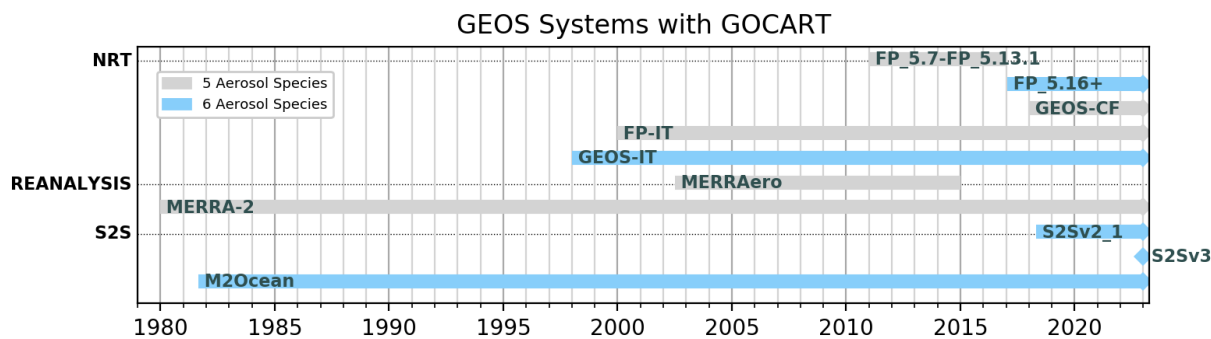

Figure S1: Timeseries of available data from operational GEOS systems coloured based on the configuration of GOCART

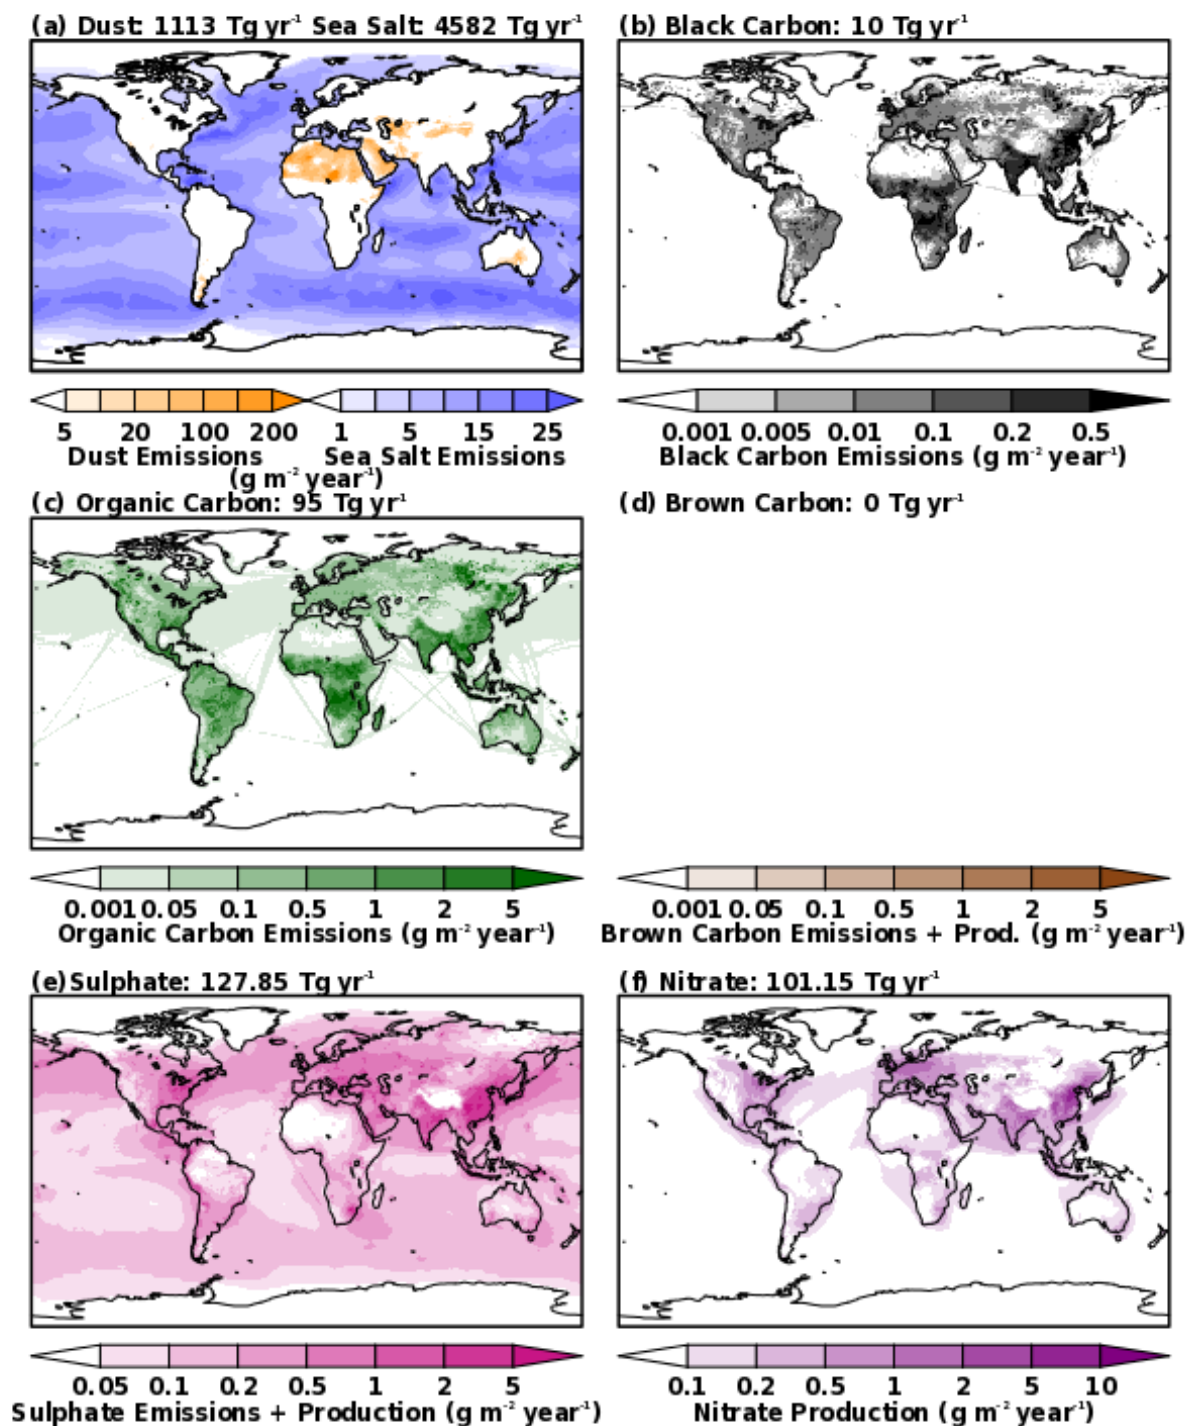

Figure S2: Emissions of (a) dust, sea salt, (b) black carbon, (c) organic carbon, (d) brown carbon, and (e) sulphate as well as the production of (d) brown carbon from secondary organic aerosol, (e) sulphate, and (f) nitrate averaged for the period of January 2016 through December 2016 in the GEOS Legacy GOCART simulation.

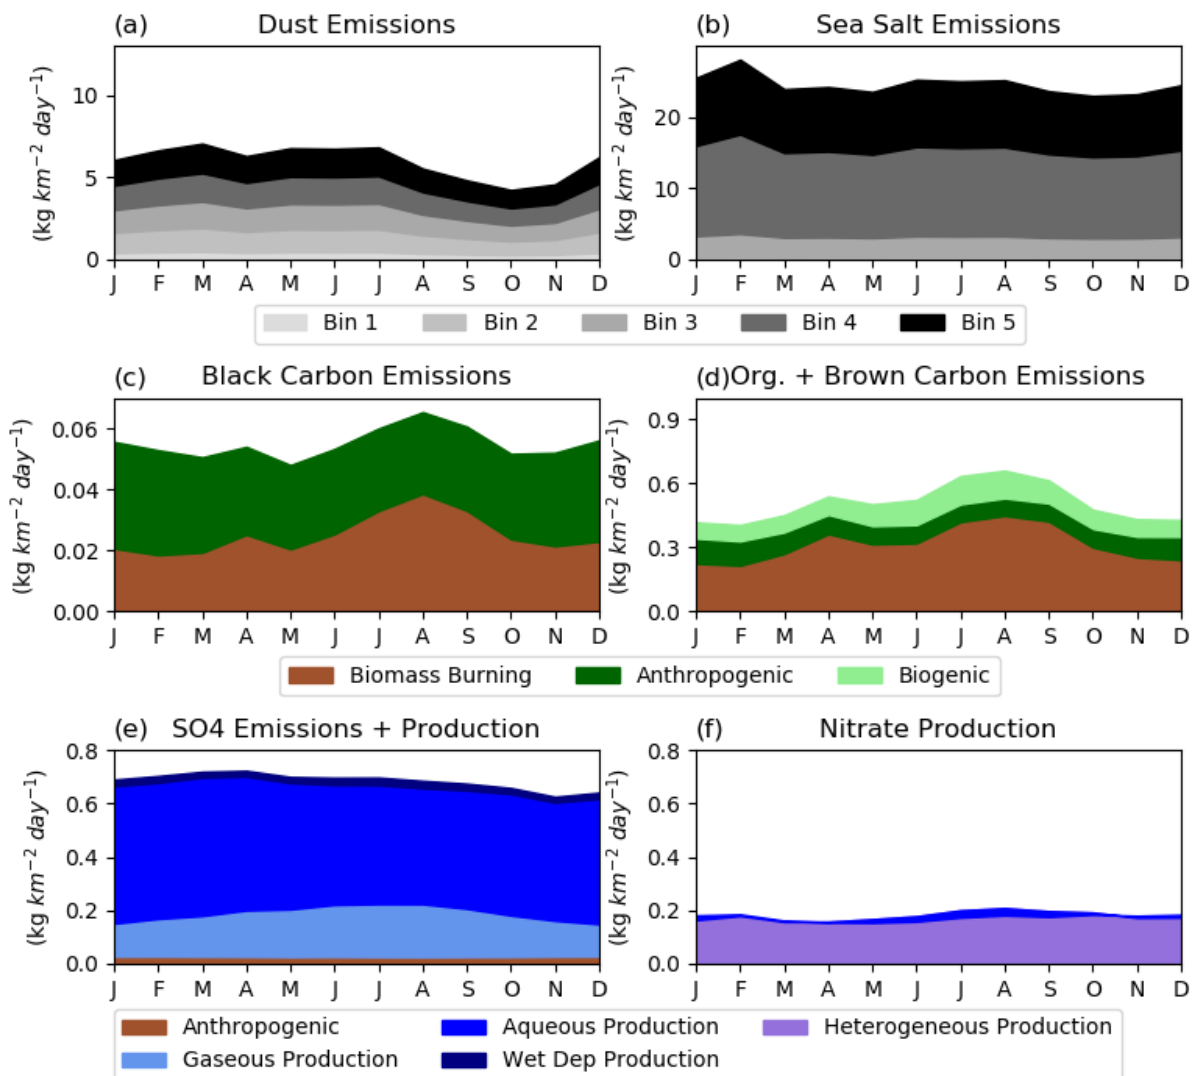

Figure S3: Timeseries of emissions and production of (a) dust, (b) sea salt, (c) black carbon, (d) organic carbon, (e) sulphate, and (f) nitrate for the period of January 2016 through December 2016 in the GEOS Legacy GOCART simulation.

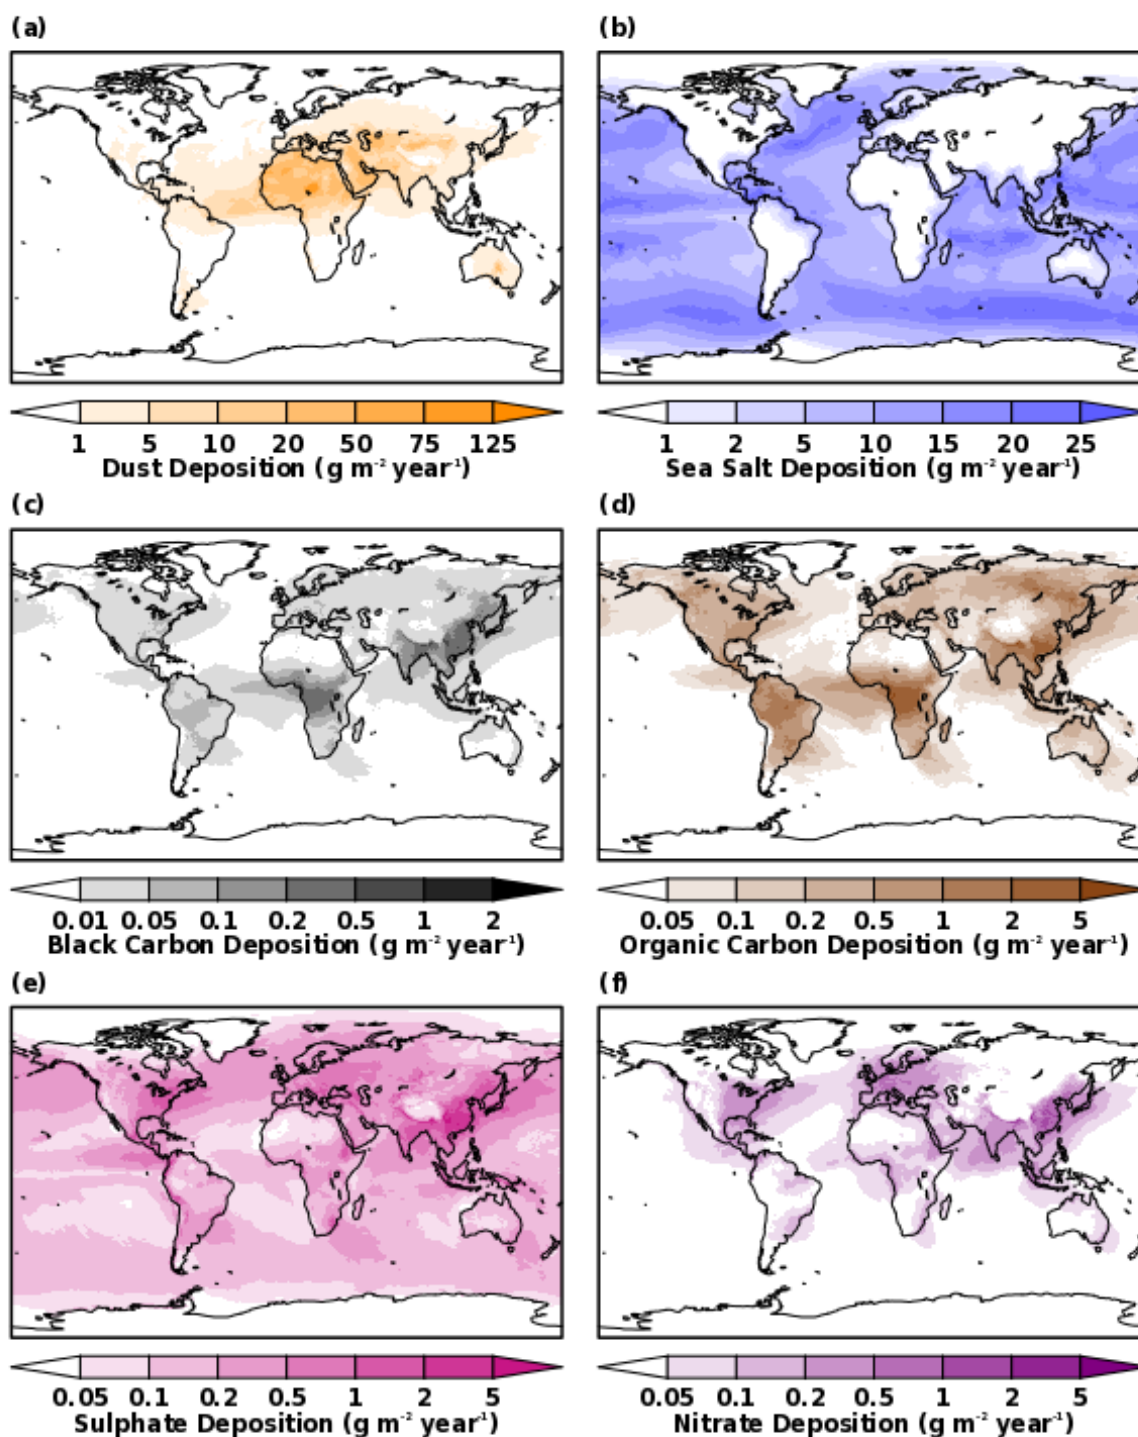

Figure S4: Deposition of (a) dust, sea salt, (b) black carbon, (c) organic carbon, (d) brown carbon, (e) sulphate, and (f) nitrate averaged for the period of January 2016 through December 2016 in the GEOS Legacy GOCART simulation.

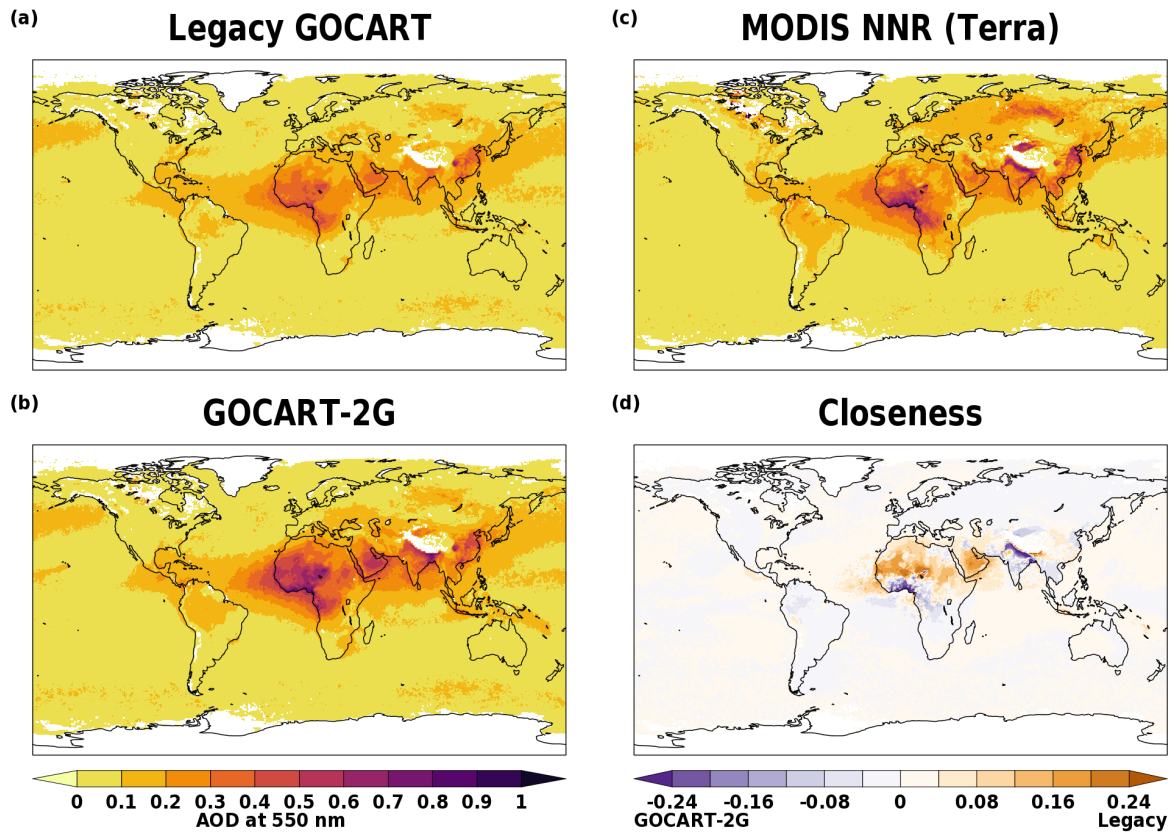

Figure S5: Average AOD at 550 for the period of January 2016 through December 2016 in the (a) GEOS Legacy GOCART simulation, (b) GEOS GOCART-2G benchmark simulation, (c) MODIS NNR observational product from Terra, and (d) the closeness to the observations defined as  $|GOCART-2G-MODIS| - |Legacy\ GOCART - MODIS|$ .

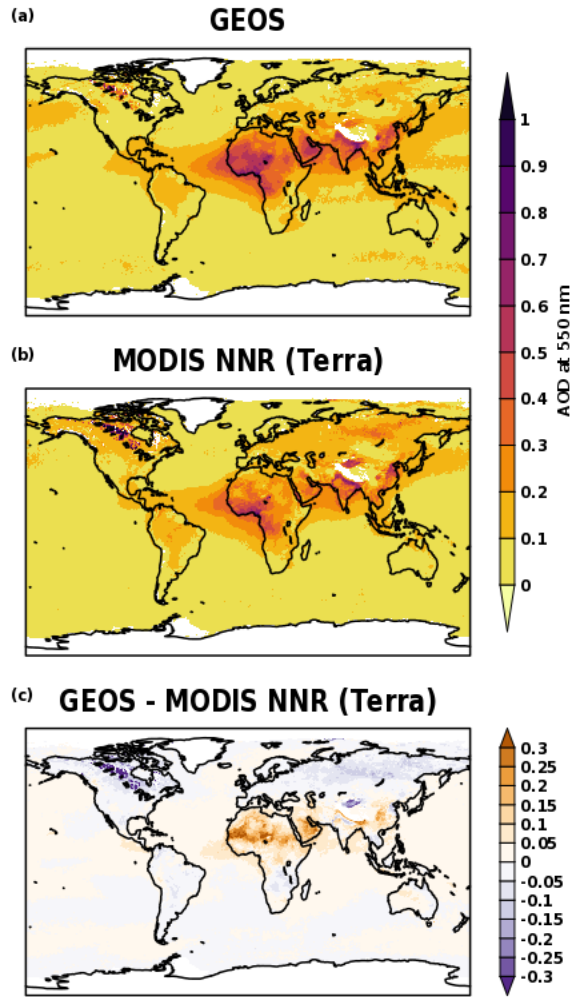

Figure S6: Average AOD at 550 for the period of January 2016 through December 2019 in the (a) GEOS GOCART2G benchmark simulation, (b) MODIS NNR observational product from Terra, and (c) the difference between the model and observations.



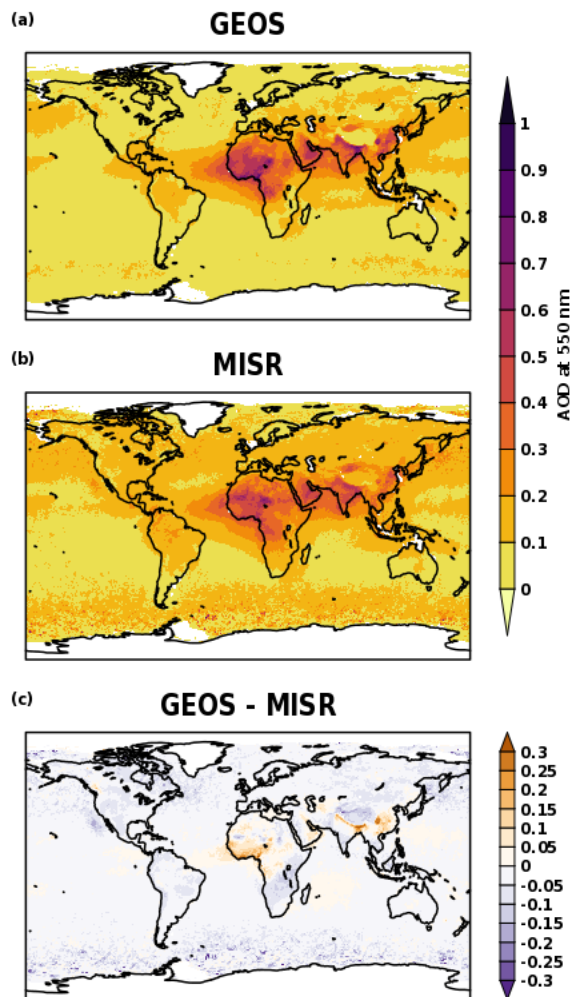

Figure S7: Average AOD at 550 for the period of January 2016 through December 2019 in the (a) GEOS GOCART2G benchmark simulation, (b) MISR, and (c) the difference between the model and observations.

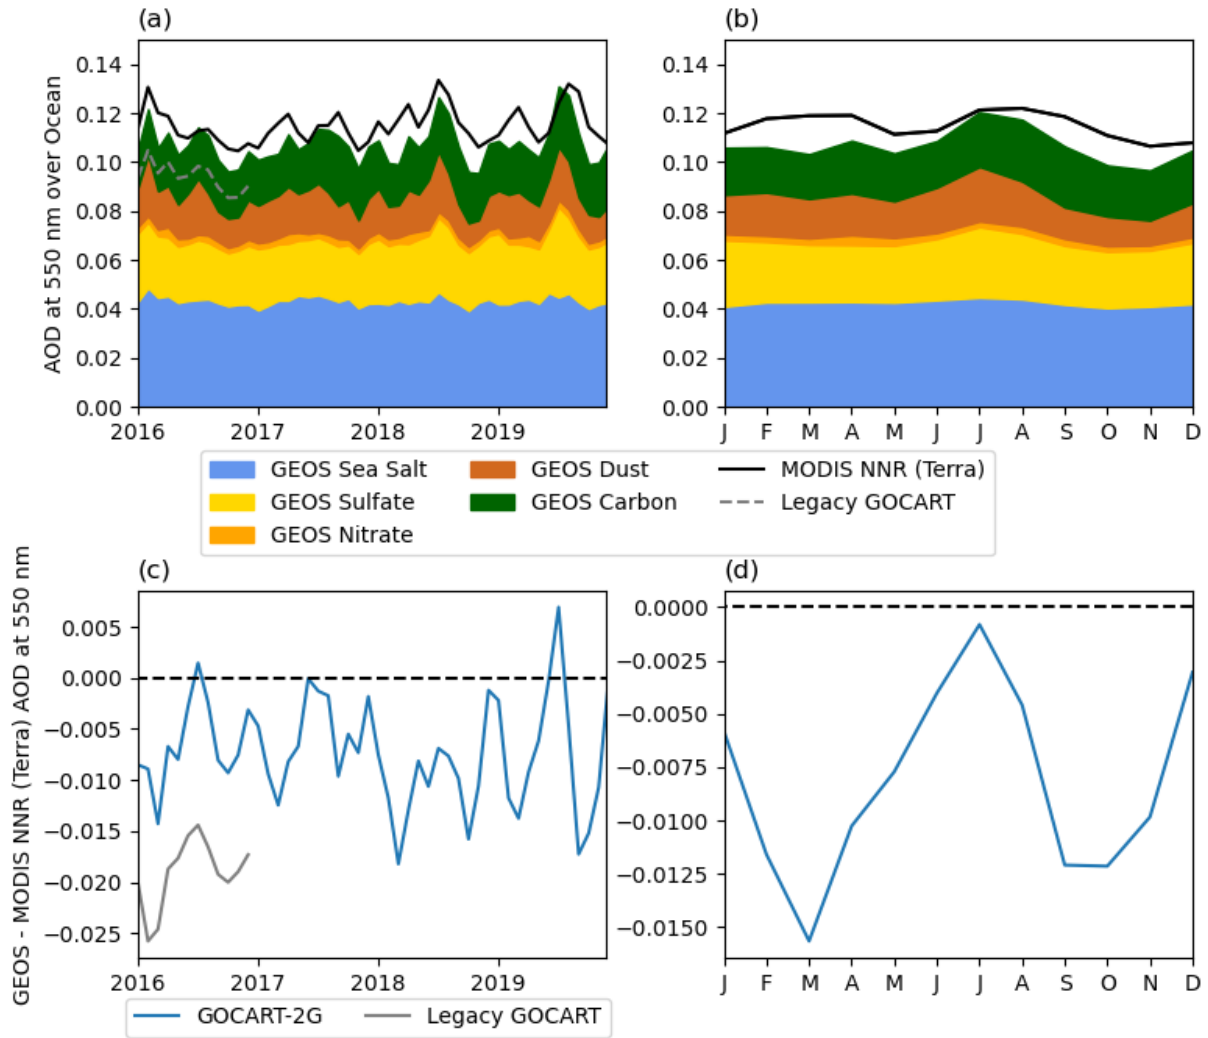

**Figure S8:** Timeseries of ocean area-averaged (a) monthly mean AOD from the Terra MODIS NNR observational product and the speciated AOD from the GEOS GOCART2G benchmark simulation, (b) mean seasonal cycle, and the difference between the model and observations for the (c) monthly mean AOD and (d) seasonal cycle of AOD. Gray lines are added in (a) and (c) for legacy GOCART during 2016 for reference.

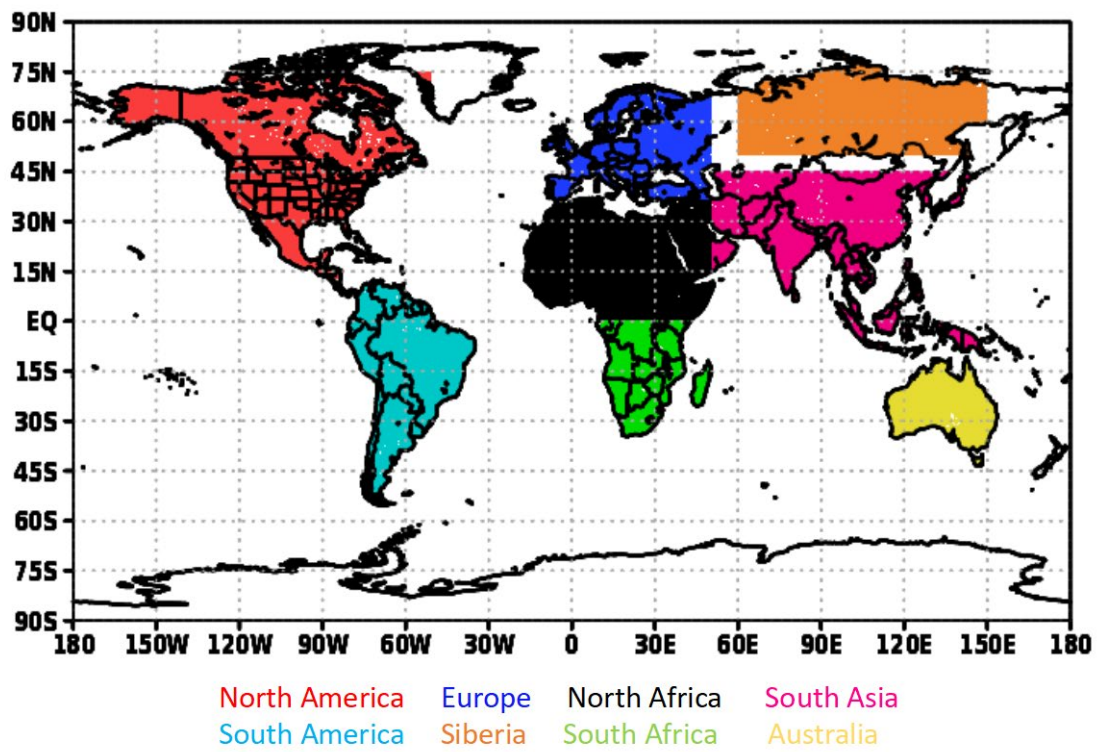

Figure S9: Map showing the area averaged regions for the AOD timeseries.

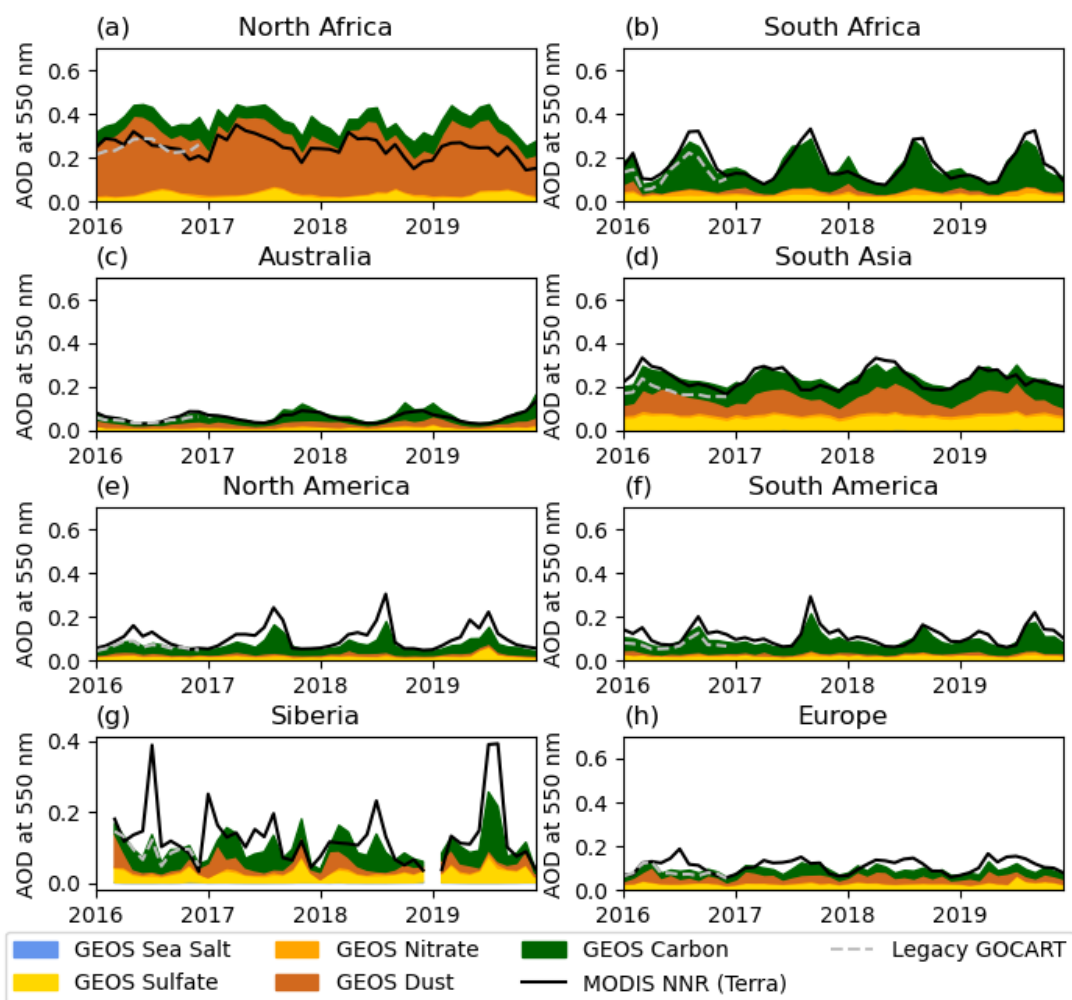

**Figure S10:** Timeseries of area-averaged monthly mean AOD from the Terra MODIS NNR observational product and the speciated AOD from the GEOS GOCART2G benchmark simulation over (a) North Africa, (b) South Africa, (c) Australia, (d) South Asia, (e) North America, (f) South America, (g) Siberia, and (h) Europe. Gray lines are added for the legacy GOCART simulation in 2016 for reference.

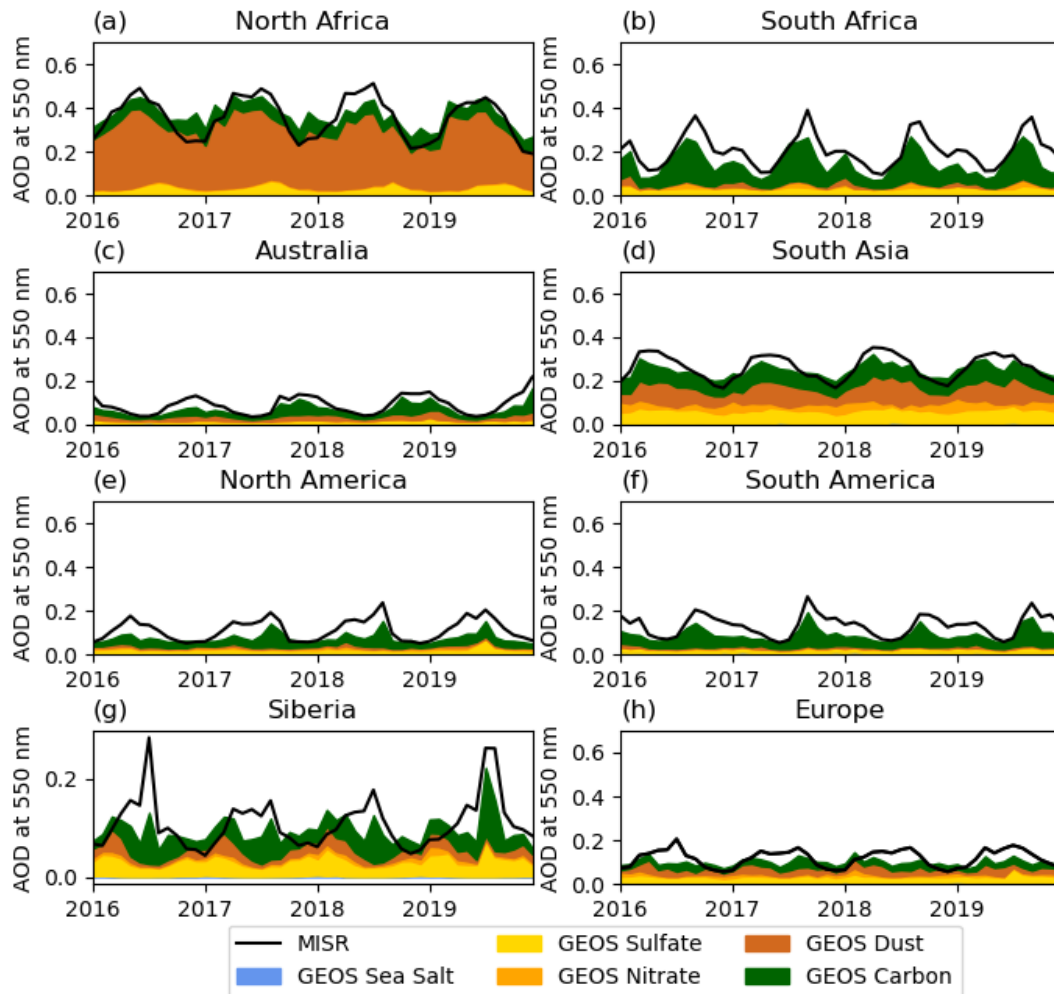

**Figure S11: Timeseries of area-averaged monthly mean AOD from MISR and the speciated AOD from the GEOS GOCART2G benchmark simulation over (a) North Africa, (b) South Africa, (c) Australia, (d) South Asia, (e) North America, (f) South America, (g) Siberia, and (h) Europe.**

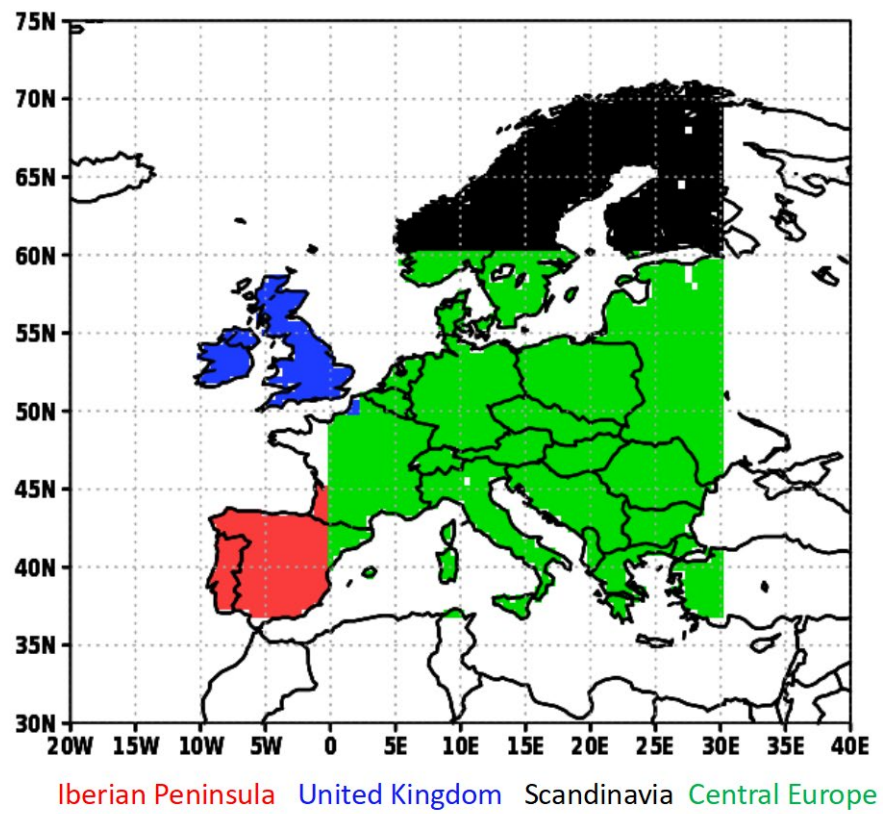

Figure S12: Map of regions used for the area averaged AOD over Europe

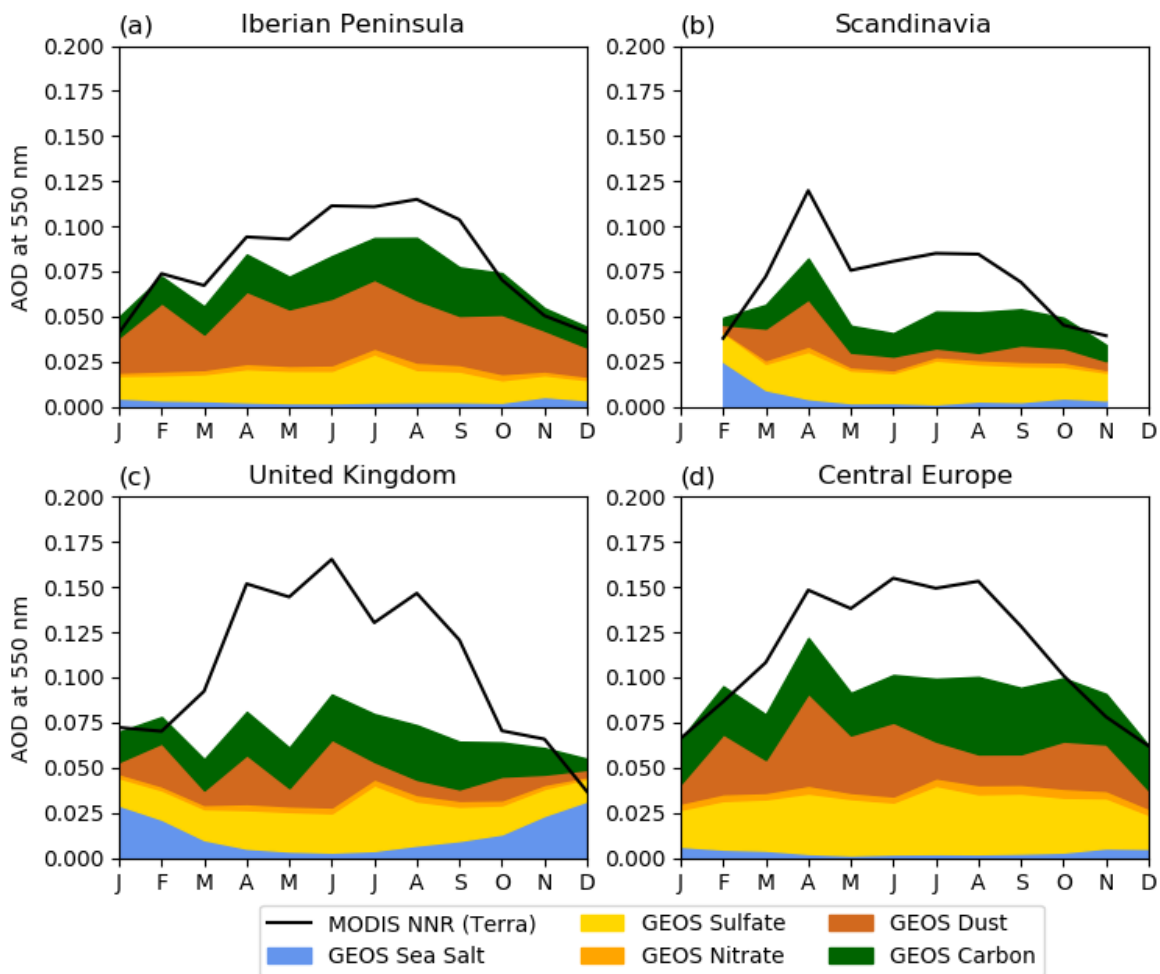

**Figure S13: Timeseries of area-averaged monthly mean AOD from the Terra MODIS NNR observational product and the speciated AOD from the GEOS GOCART2G benchmark simulation over (a) the Iberian Peninsula, (b) Scandinavia, (c) the United Kingdom, and (d) central Europe.**

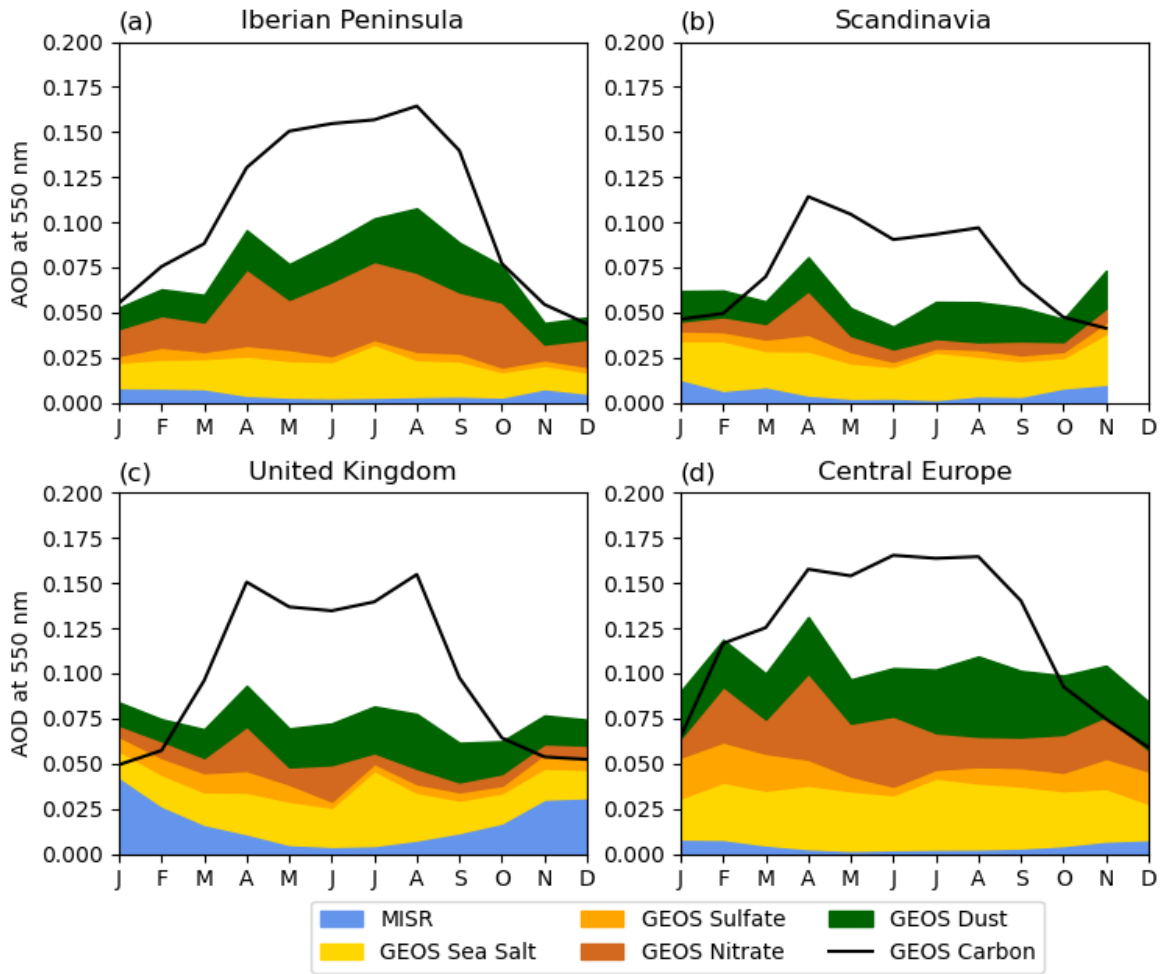

Figure S14: Timeseries of area-averaged monthly mean AOD at 550 nm from the Terra MODIS NNR observational product and the speciated AOD from the GEOS GOCART2G benchmark simulation over (a) the Iberian Peninsula, (b) Scandinavia, (c) the United Kingdom, and (d) central Europe.



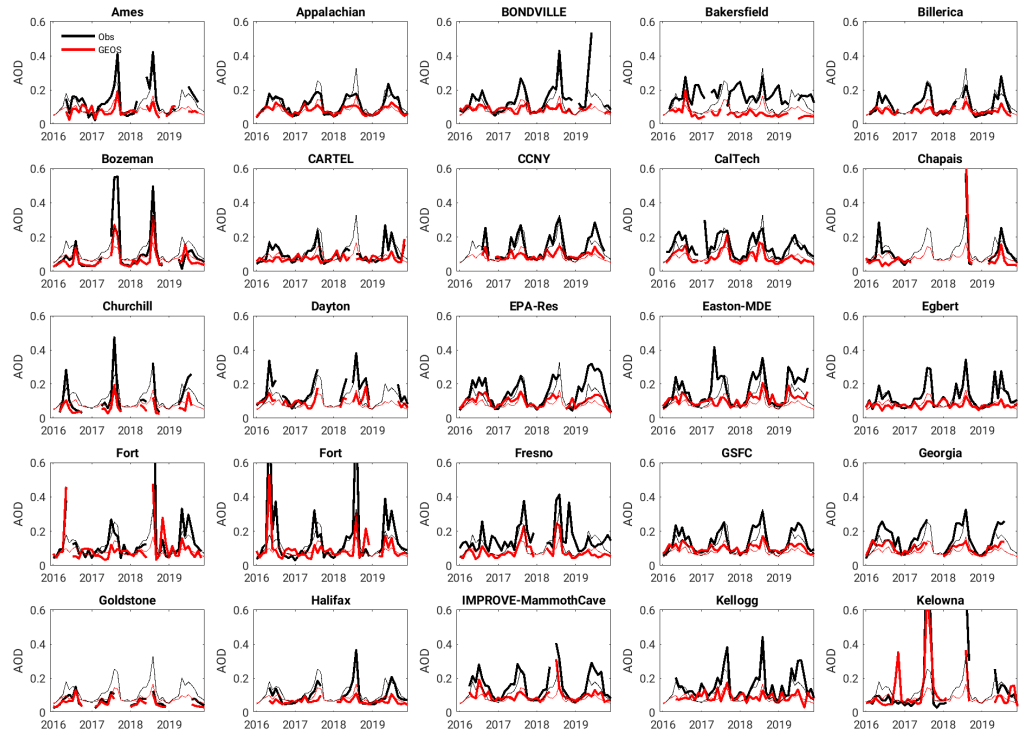

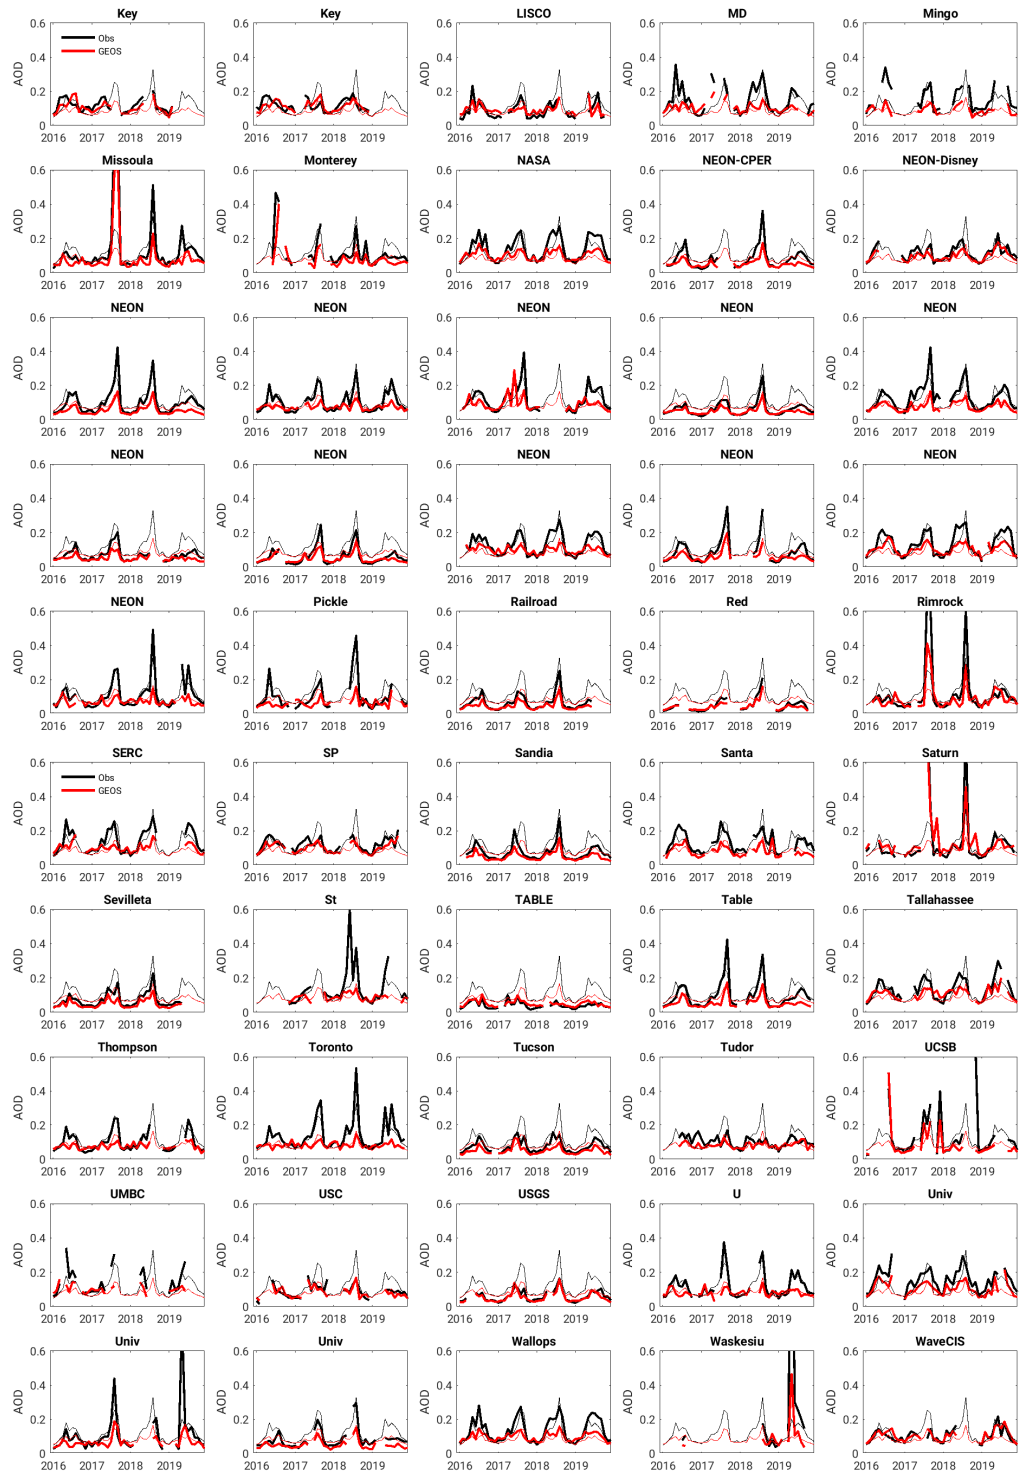

**Figure S15: Time series of AOD at 550 nm from GEOS and AERONET sites across the United States and Canada (bold lines). Thin lines indicate the mean for all sites.**

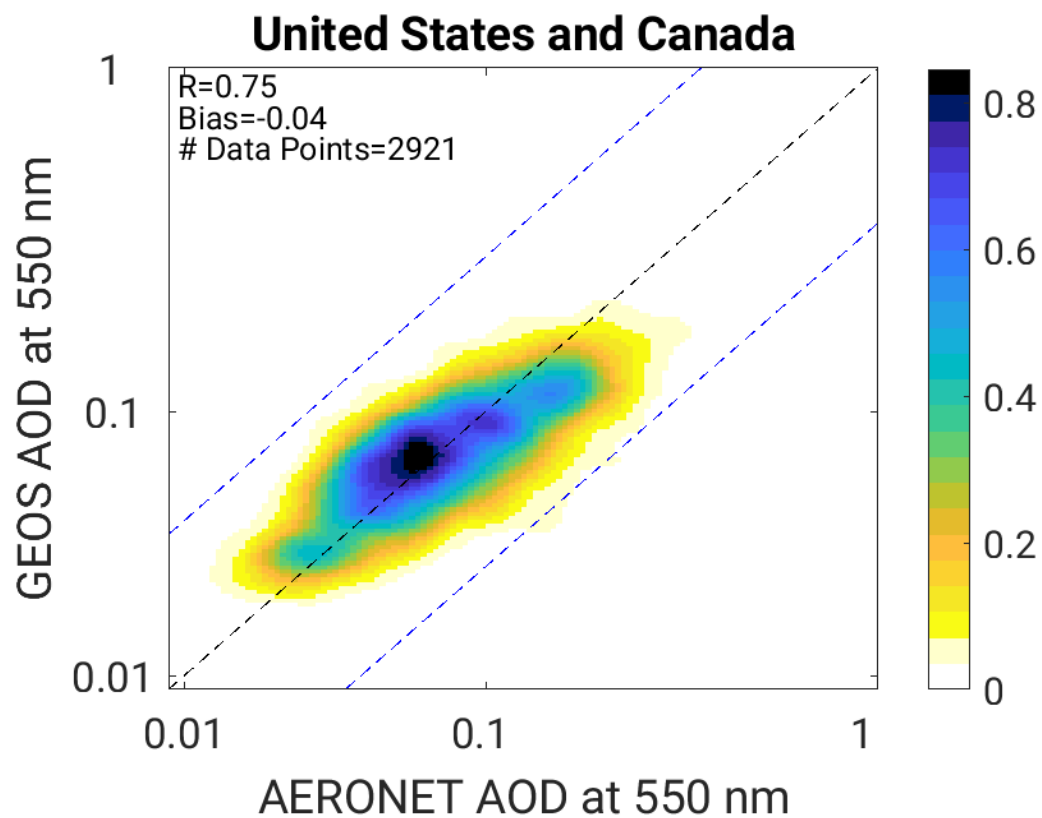

Figure S16: 2-D kernel density estimate for AOD at 550 nm computed as  $\log(\text{AOD}+0.01)$  from 77 AERONET stations across the United States and Canada for co-located data points from the observations and the GOCART-2G benchmark simulation. The statistics are computed as  $\log(\text{AOD}+0.01)$ . The black dashed line in (b) and (d) indicates the one-to-one line with the blue dashed lines are the one-to-one line plus or minus one of the one-to-one line.

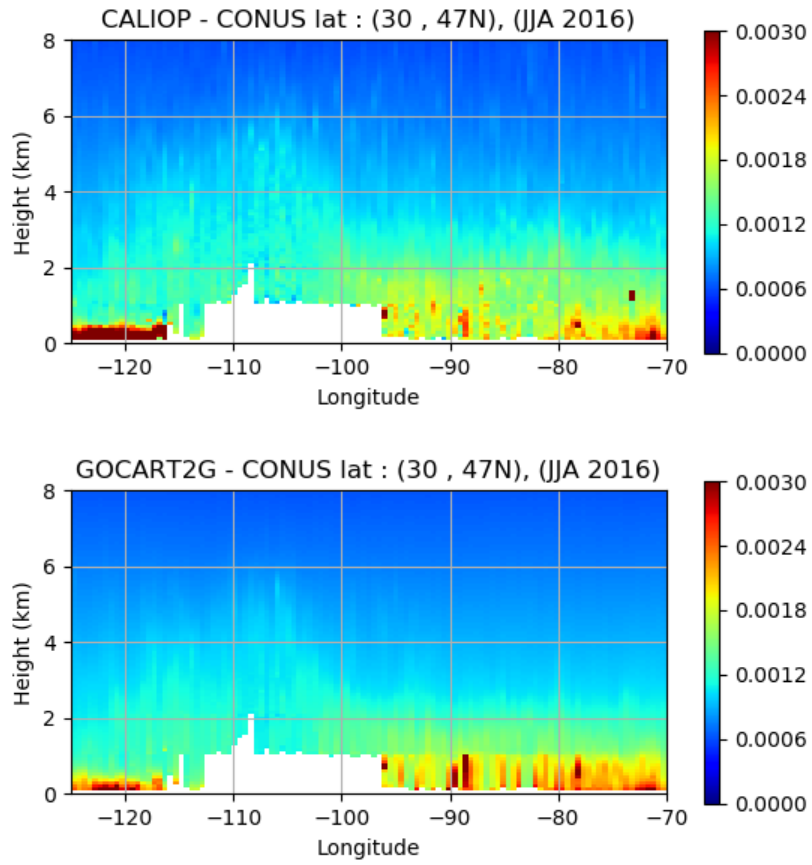

**Figure S17: Regional 3-month average (JJA 2016) of CALIOP attenuated backscatter coefficient ( $\text{km}^{-1}\text{sr}^{-1}$ ) at 532nm over the continental United States (30°N-47°N, 120°W-70°W) on the top. On the bottom, GEOS GOCART2G attenuated backscatter coefficient sampled on the CALIPSO track for the same period.**

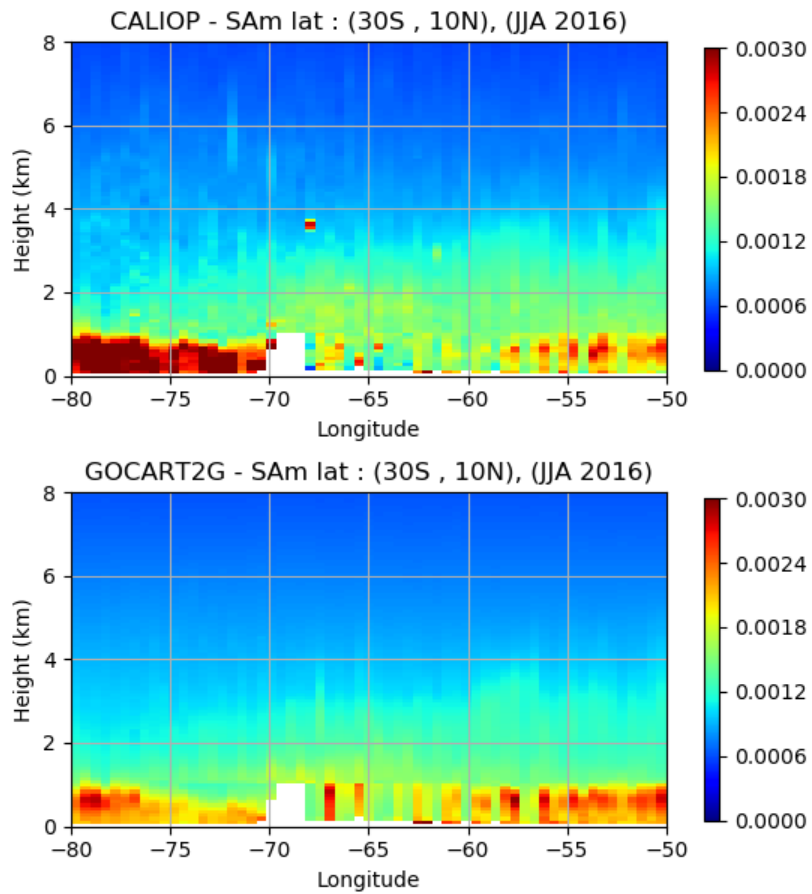

Figure S18: Same as figure S17 but over South America (30°S-10°N, 60°E-20°E).

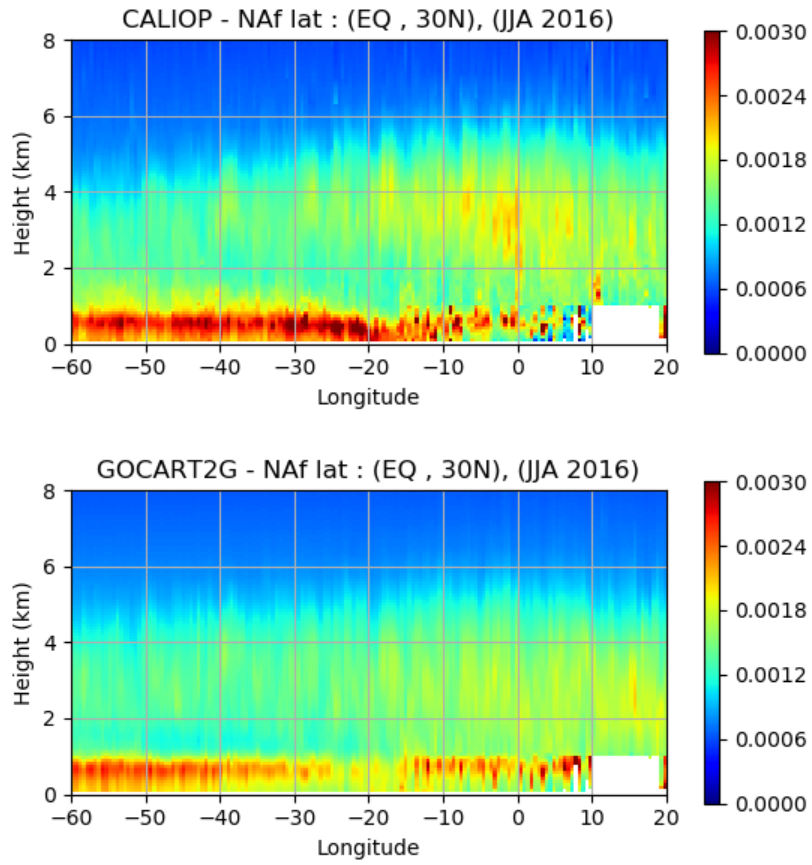

Figure S19: Same as figure S17 but over northern Africa (Eq-30°N, 60°E-20°E).

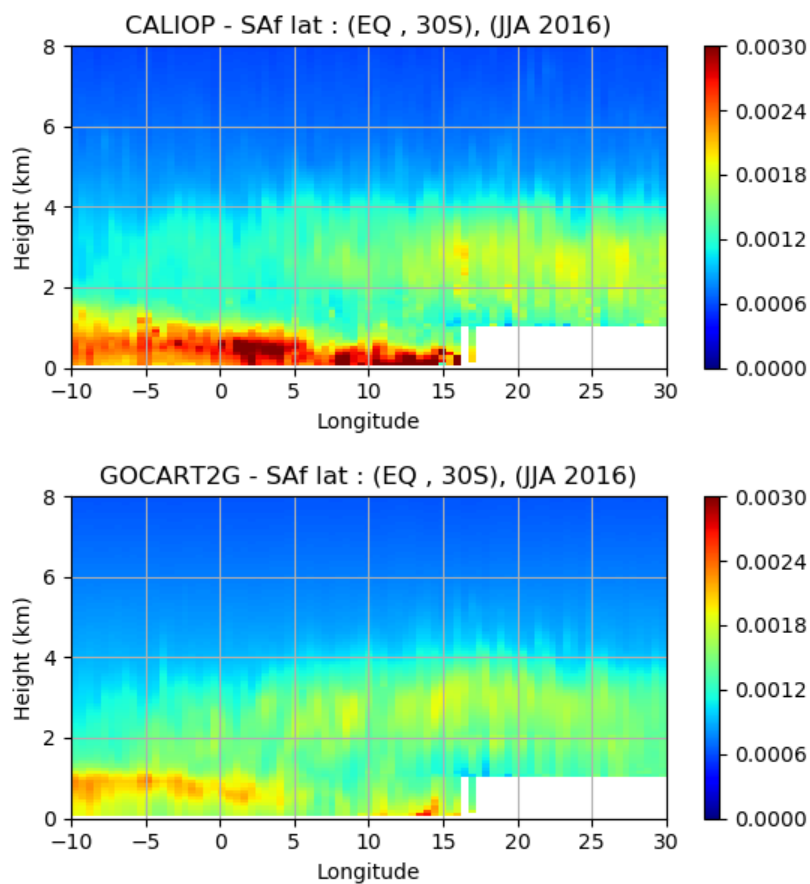

Figure S20: Same as figure S17 but over southern Africa (30°S-Eq, 10°W-30°E).

### S3. Required Imports for GOCART-2G

Table S1: Imports required for GOCART-2G

| Variable Short Name | Variable Long Name           | Dimensions | Component GridComp                                 |
|---------------------|------------------------------|------------|----------------------------------------------------|
| DELP                | Pressure Thickness           | xyz        | GOCART2G, Carbon, Dust, Nitrate, Sea Salt, Sulfate |
| AIRDENS             | Air Density                  | xyz        | GOCART2G, Carbon, Dust, Nitrate, Sea Salt, Sulfate |
| T                   | Air Temperature              | xyz        | GOCART2G, Carbon, Dust, Nitrate, Sea Salt, Sulfate |
| PLE                 | Air Pressure                 | xyz        | GOCART2G, Carbon, Dust, Nitrate, Sea Salt          |
| FROCEAN             | Fraction of Ocean            | xy         | Carbon, Sea Salt, Sulfate                          |
| FRACI               | Ice Covered Fraction of Tile | xy         | Carbon, Sea Salt                                   |

|                 |                                                |     |                                          |
|-----------------|------------------------------------------------|-----|------------------------------------------|
| FRLAKE          | Fraction of Lake                               | xy  | Carbon, Dust, Sea Salt                   |
| LWI             | Land-Ocean-Ice Mask                            | xy  | Carbon, Dust, Nitrate, Sea Salt, Sulfate |
| TROPP           | Tropopause Pressure                            | xy  | Carbon, Dust, Nitrate, Sea Salt, Sulfate |
| U10M            | 10 m Eastward Wind                             | xy  | Carbon, Dust, Sea Salt, Sulfate          |
| V10M            | 10 m Northward Wind                            | xy  | Carbon, Dust, Sea Salt, Sulfate          |
| AREA            | Grid Cell Area                                 | xy  | Carbon, Dust, Nitrate, Sea Salt, Sulfate |
| ZPBL            | Planetary Boundary Layer Height                | xy  | Carbon, Dust, Nitrate, Sea Salt, Sulfate |
| SH              | Sensible Heat Flux                             | xy  | Carbon, Dust, Nitrate, Sea Salt, Sulfate |
| Z0H             | Surface Roughness for heat                     | xy  | Carbon, Dust, Nitrate, Sea Salt, Sulfate |
| CN_PRCP         | Surface Convective Rain Flux                   | xy  | Carbon, Dust, Nitrate, Sea Salt, Sulfate |
| NCN_PRCP        | Non-convective Precipitation                   | xy  | Carbon, Dust, Nitrate, Sea Salt, Sulfate |
| RH2             | Relative Humidity after Moist                  | xyz | Carbon, Dust, Nitrate, Sea Salt, Sulfate |
| ZLE             | Geopotential Height                            | xyz | Carbon, Dust, Nitrate, Sea Salt, Sulfate |
| PFL_LSAN        | 3D Flux of liquid non-convective precipitation | xyz | Carbon, Dust, Nitrate, Sea Salt, Sulfate |
| PFI_LSAN        | 3D Flux of ice non-convective precipitation    | xyz | Carbon, Dust, Nitrate, Sea Salt, Sulfate |
| U               | Eastward Wind                                  | xyz | Carbon, Dust, Nitrate, Sea Salt, Sulfate |
| V               | Northward Wind                                 | xyz | Carbon, Dust, Nitrate, Sea Salt, Sulfate |
| OC_AIRCRAFT     | Aircraft Emissions of Organic Carbon           | xyz | Carbon                                   |
| BC_AIRCRAFT     | Aircraft Emissions of Black Carbon             | xyz | Carbon                                   |
| BRC_AIRCRAFT    | Aircraft Emissions of Brown Carbon             | xyz | Carbon                                   |
| pSOA_ANTHRO_VOC | SOA from Anthropogenic VOC                     | xyz | Carbon                                   |
| pSOA_BIOB_VOC   | SOA from Biomass Burning VOC                   | xyz | Carbon                                   |
| OC_BIOMASS      | Biomass Burning Emissions of OC                | xy  | Carbon                                   |
| OC_ISOPRENE     | Source Species                                 | xy  | Carbon                                   |



|                  |                                            |    |        |
|------------------|--------------------------------------------|----|--------|
| OC_MTPA          | Source Species                             | xy | Carbon |
| OC_LIMO          | Source Species                             | xy | Carbon |
| OC_Biofuel       | Biofuel Emissions of OC                    | Xy | Carbon |
| OC_ANTEOC1       | Anthropogenic Biofuel Emissions            | xy | Carbon |
| OC_ANTEOC2       | Anthropogenic Fossil Fuel Emissions        | xy | Carbon |
| OC_SHIP          | Ship Emissions of OC                       | xy | Carbon |
| OC_Aviation_LTO  | Landing/Take-off Aircraft Emissions of OC  | xy | Carbon |
| OC_Aviation_CDS  | Climb/Descent Aircraft Emissions of OC     | xy | Carbon |
| OC_Aviation_CRS  | Cruise Aircraft Emissions of OC            | xy | Carbon |
| BC_BIOMASS       | Biomass Burning Emissions of BC            | xy | Carbon |
| BC_Biofuel       | Biofuel Emissions of BC                    | xy | Carbon |
| BC_ANTEBC1       | Anthropogenic Biofuel Emissions of BC      | xy | Carbon |
| BC_ANTEBC2       | Anthropogenic Fossil Fuel Emissions of BC  | xy | Carbon |
| BC_SHIP          | Ship Emissions of BC                       | xy | Carbon |
| BC_Aviation_LTO  | Landing/Take-off Aircraft Emissions of BC  | xy | Carbon |
| BC_Aviation_CDS  | Climb/Descent Aircraft Emissions of BC     | xy | Carbon |
| BC_Aviation_CRS  | Cruise Aircraft Emissions of BC            | xy | Carbon |
| BRC_Biofuel      | Biofuel Emissions of BRC                   | xy | Carbon |
| BRC_ANTEOC1      | Anthropogenic Biofuel Emissions of BRC     | xy | Carbon |
| BRC_ANTEOC2      | Anthropogenic Fossil Fuel Emissions of BRC | xy | Carbon |
| BRC_SHIP         | Ship Emissions of BRC                      | xy | Carbon |
| BRC_Aviation_LTO | Landing/Take-off Aircraft Emissions of BRC | xy | Carbon |
| BRC_Aviation_CDS | Climb/Descent Aircraft Emissions of BRC    | xy | Carbon |
| BRC_Aviation_CRS | Cruise Aircraft Emissions of BRC           | xy | Carbon |
| BRC_TERPENE      | Biomass Terpene Emissions                  | xy | Carbon |
| DU_SRC           | Dust Emission Source                       | xy | Dust   |
| WET1             | Surface Soil Wetness                       | xy | Dust   |

|                 |                                              |     |                                  |
|-----------------|----------------------------------------------|-----|----------------------------------|
| USTAR           | Surface Velocity Scale                       | xy  | Dust, Nitrate, Sea Salt, Sulfate |
| EMI_NH3_AG      | Agriculture Emissions of NH <sub>3</sub>     | xy  | Nitrate                          |
| EMI_NH3_BB      | Biomass Burning Emissions of NH <sub>3</sub> | xy  | Nitrate                          |
| EMI_NH3_EN      | Energy Emissions of NH <sub>3</sub>          | xy  | Nitrate                          |
| EMI_NH3_IN      | Industry Emissions of NH <sub>3</sub>        | xy  | Nitrate                          |
| EMI_NH3_OC      | Ocean Emissions of NH <sub>3</sub>           | xy  | Nitrate                          |
| EMI_NH3_RE      | Residential Emissions of NH <sub>3</sub>     | xy  | Nitrate                          |
| EMI_NH3_TR      | Transport Emissions of NH <sub>3</sub>       | xy  | Nitrate                          |
| Nitrate_HNO3    | Nitrate HNO <sub>3</sub> Emissions           | xyz | Nitrate                          |
| DU              | Dust Mixing Ratio for All Bins               | xyz | Nitrate                          |
| SS              | Sea Salt Mixing Ratio for All Bins           | xyz | Nitrate                          |
| SU              | Sulfate Mixing Ratio                         | xyz | Nitrate                          |
| TS              | Surface Skin Temperature                     | xy  | Sea Salt                         |
| DZ              | Surface Layer Height                         | xy  | Sea Salt                         |
| FCLD            | Cloud Fraction for Radiation                 | xyz | Sulfate                          |
| pSO2_OCS        | Source Species                               | xyz | Sulfate                          |
| SU_AIRCRAFT     | Aircraft Emissions                           | xyz | Sulfate                          |
| SU_NO3          | Climatological NO <sub>3</sub>               | xyz | Sulfate                          |
| SU_OH           | Climatological OH                            | xyz | Sulfate                          |
| SU_H2O2         | Climatological H <sub>2</sub> O <sub>2</sub> | xyz | Sulfate                          |
| SU_BIOMASS      | Biomass Burning Emissions                    | xy  | Sulfate                          |
| SU_ANTHROL1     | Anthropogenic Biofuel Emissions              | xy  | Sulfate                          |
| SU_ANTHROL2     | Anthropogenic Fossil Fuel Emissions          | xy  | Sulfate                          |
| SU_SHIPSO2      | SO <sub>2</sub> Shipping Emissions           | xy  | Sulfate                          |
| SU_SHIPSO4      | SO <sub>4</sub> Shipping Emissions           | xy  | Sulfate                          |
| SU_DMSO         | DMS Emissions                                | xy  | Sulfate                          |
| SU_AVIATION_LTO | Landing/Take-off Aircraft Emissions          | xy  | Sulfate                          |
| SU_AVIATION_CDS | Climb/Descent Aircraft Emissions             | xy  | Sulfate                          |
| SU_AVIATION_CRS | Cruise Aircraft Emissions                    | xy  | Sulfate                          |

#### S4. Sample Timings for GEOS

Timers were turned on for a 16-day segment with legacy GOCART and GOCART-2G without StratChem. The chemistry component of the model accounted for 26.44% of the run time with legacy GOCART, of which 22.58% was from GOCART itself. This was reduced to 21.14% is response to the improved code in GOCART-2G, with 16.19% from the aerosol module. However, with the addition of new tracers for brown carbon and secondary organic aerosol, the time to transport the aerosols increased in GOCART-2G. In the segments with the timers on, the model throughput was 76.86 days per day with legacy GOCART and 83.62 days per day with GOCART-2G. Additional details for the timings within each version of GOCART are shown below.

### S4.1 GOCART-2G

Times for component <GOCART2G>

| Name               | Min   |           |           | Mean  |           |           | Max   |           |           | PE    |       | # cycles |
|--------------------|-------|-----------|-----------|-------|-----------|-----------|-------|-----------|-----------|-------|-------|----------|
|                    | %     | inclusive | exclusive | %     | inclusive | exclusive | %     | inclusive | exclusive | max   | min   |          |
| GOCART2G           | 0.00  | 2398.24   | 0.02      | 0.00  | 2681.19   | 0.03      | 0.00  | 2994.81   | 0.03      | 00118 | 00177 | 12355    |
| --SetService       | 0.00  | 0.08      | 0.06      | 0.00  | 0.14      | 0.12      | 0.01  | 0.18      | 0.16      | 00199 | 00033 | 1        |
| ----generic        | 0.00  | 0.02      | 0.02      | 0.00  | 0.02      | 0.02      | 0.00  | 0.03      | 0.03      | 00136 | 00198 | 1        |
| ----Initialize     | 0.00  | 12.89     | 0.02      | 0.00  | 12.90     | 0.03      | 0.00  | 12.92     | 0.04      | 00006 | 00108 | 1        |
| ----DU             | 0.21  | 5.02      | 5.02      | 0.19  | 5.02      | 5.02      | 0.17  | 5.05      | 5.05      | 00139 | 00097 | 1        |
| ----SS             | 0.21  | 4.92      | 4.92      | 0.18  | 4.94      | 4.94      | 0.17  | 4.95      | 4.95      | 00033 | 00139 | 1        |
| ----CA.oc          | 0.02  | 0.38      | 0.38      | 0.01  | 0.39      | 0.39      | 0.01  | 0.40      | 0.40      | 00087 | 00203 | 1        |
| ----CA.bc          | 0.02  | 0.44      | 0.44      | 0.02  | 0.45      | 0.45      | 0.02  | 0.46      | 0.46      | 00215 | 00027 | 1        |
| ----CA.br          | 0.02  | 0.42      | 0.42      | 0.02  | 0.42      | 0.42      | 0.02  | 0.45      | 0.45      | 00184 | 00060 | 1        |
| ----SU             | 0.03  | 0.75      | 0.75      | 0.03  | 0.78      | 0.78      | 0.03  | 0.79      | 0.79      | 00215 | 00184 | 1        |
| ----NI             | 0.03  | 0.82      | 0.82      | 0.03  | 0.83      | 0.83      | 0.03  | 0.85      | 0.85      | 00095 | 00215 | 1        |
| ----generic        | 0.00  | 0.03      | 0.03      | 0.00  | 0.03      | 0.03      | 0.00  | 0.04      | 0.04      | 00204 | 00094 | 1        |
| --Record           | 0.00  | 1.06      | 0.08      | 0.00  | 1.10      | 0.08      | 0.00  | 1.26      | 0.10      | 00020 | 00205 | 3072     |
| ----DU             | 0.01  | 0.15      | 0.15      | 0.01  | 0.16      | 0.16      | 0.01  | 0.18      | 0.18      | 00180 | 00002 | 3072     |
| ----SS             | 0.01  | 0.15      | 0.15      | 0.01  | 0.16      | 0.16      | 0.01  | 0.17      | 0.17      | 00180 | 00002 | 3072     |
| ----CA.oc          | 0.00  | 0.12      | 0.12      | 0.00  | 0.12      | 0.12      | 0.00  | 0.14      | 0.14      | 00180 | 00002 | 3072     |
| ----CA.bc          | 0.00  | 0.12      | 0.12      | 0.00  | 0.12      | 0.12      | 0.00  | 0.14      | 0.14      | 00100 | 00002 | 3072     |
| ----CA.br          | 0.00  | 0.11      | 0.11      | 0.00  | 0.12      | 0.12      | 0.00  | 0.14      | 0.14      | 00180 | 00115 | 3072     |
| ----SU             | 0.01  | 0.16      | 0.16      | 0.01  | 0.16      | 0.16      | 0.01  | 0.19      | 0.19      | 00180 | 00123 | 3072     |
| ----NI             | 0.01  | 0.17      | 0.17      | 0.01  | 0.18      | 0.18      | 0.01  | 0.20      | 0.20      | 00180 | 00177 | 3072     |
| ----generic        | 0.00  | 0.00      | 0.00      | 0.00  | 0.00      | 0.00      | 0.00  | 0.00      | 0.00      | 00180 | 00137 | 3072     |
| --Run              | 0.00  | 103.81    | 0.01      | 0.00  | 106.46    | 0.01      | 0.00  | 110.28    | 0.01      | 00180 | 00080 | 4608     |
| ----GenRunMine     | 4.33  | 103.80    | 103.80    | 3.97  | 106.45    | 106.45    | 3.68  | 110.26    | 110.26    | 00180 | 00204 | 4608     |
| --Run2             | 0.00  | 2269.48   | 0.01      | 0.00  | 2552.25   | 0.01      | 0.00  | 2867.05   | 0.02      | 00152 | 00016 | 4608     |
| ----GenRunMine     | 94.74 | 2269.46   | 2269.46   | 95.19 | 2552.23   | 2552.23   | 95.56 | 2867.04   | 2867.04   | 00016 | 00061 | 4608     |
| --Refresh          | 0.00  | 0.39      | 0.00      | 0.00  | 0.42      | 0.00      | 0.00  | 0.45      | 0.00      | 00070 | 00002 | 64       |
| ----GenRefreshTot  | 0.00  | 0.39      | 0.00      | 0.00  | 0.42      | 0.01      | 0.00  | 0.45      | 0.01      | 00007 | 00000 | 64       |
| ----DU             | 0.00  | 0.05      | 0.05      | 0.00  | 0.06      | 0.06      | 0.00  | 0.07      | 0.07      | 00192 | 00203 | 64       |
| ----SS             | 0.00  | 0.05      | 0.05      | 0.00  | 0.06      | 0.06      | 0.00  | 0.07      | 0.07      | 00192 | 00174 | 64       |
| ----CA.oc          | 0.00  | 0.04      | 0.04      | 0.00  | 0.05      | 0.05      | 0.00  | 0.05      | 0.05      | 00000 | 00174 | 64       |
| ----CA.bc          | 0.00  | 0.04      | 0.04      | 0.00  | 0.04      | 0.04      | 0.00  | 0.05      | 0.05      | 00000 | 00173 | 64       |
| ----CA.br          | 0.00  | 0.04      | 0.04      | 0.00  | 0.04      | 0.04      | 0.00  | 0.05      | 0.05      | 00000 | 00137 | 64       |
| ----SU             | 0.00  | 0.07      | 0.07      | 0.00  | 0.07      | 0.07      | 0.00  | 0.08      | 0.08      | 00140 | 00173 | 64       |
| ----NI             | 0.00  | 0.08      | 0.08      | 0.00  | 0.08      | 0.08      | 0.00  | 0.09      | 0.09      | 00180 | 00009 | 64       |
| ----GenRefreshMine | 0.00  | 0.00      | 0.00      | 0.00  | 0.00      | 0.00      | 0.00  | 0.00      | 0.00      | 00020 | 00043 | 64       |
| --Finalize         | 0.00  | 7.89      | 0.00      | 0.00  | 7.89      | 0.00      | 0.00  | 7.90      | 0.00      | 00048 | 00201 | 1        |
| ----DU             | 0.09  | 2.07      | 2.07      | 0.08  | 2.07      | 2.07      | 0.07  | 2.07      | 2.07      | 00204 | 00000 | 1        |
| ----SS             | 0.09  | 2.07      | 2.07      | 0.08  | 2.07      | 2.07      | 0.07  | 2.07      | 2.07      | 00000 | 00149 | 1        |
| ----CA.oc          | 0.02  | 0.54      | 0.54      | 0.02  | 0.54      | 0.54      | 0.02  | 0.54      | 0.54      | 00001 | 00000 | 1        |
| ----CA.bc          | 0.02  | 0.54      | 0.54      | 0.02  | 0.54      | 0.54      | 0.02  | 0.54      | 0.54      | 00147 | 00212 | 1        |
| ----CA.br          | 0.02  | 0.55      | 0.55      | 0.02  | 0.55      | 0.55      | 0.02  | 0.56      | 0.56      | 00213 | 00149 | 1        |
| ----SU             | 0.04  | 0.96      | 0.96      | 0.04  | 0.96      | 0.96      | 0.03  | 0.96      | 0.96      | 00000 | 00054 | 1        |
| ----NI             | 0.05  | 1.16      | 1.16      | 0.04  | 1.17      | 1.17      | 0.04  | 1.17      | 1.17      | 00214 | 00000 | 1        |
| ----generic        | 0.00  | 0.00      | 0.00      | 0.00  | 0.00      | 0.00      | 0.00  | 0.00      | 0.00      | 00000 | 00072 | 1        |

### S4.2 Legacy GOCART

| Times for component <GOCART> |       |           |           |       |           |           |       |           |           |       |        |          |
|------------------------------|-------|-----------|-----------|-------|-----------|-----------|-------|-----------|-----------|-------|--------|----------|
| Name                         | Min   |           |           | Mean  |           |           | Max   |           |           | PE    |        | # cycles |
|                              | %     | inclusive | exclusive | %     | inclusive | exclusive | %     | inclusive | exclusive | max   | min    |          |
| GOCART                       | 0.00  | 4041.37   | 0.03      | 0.00  | 4079.13   | 0.03      | 0.00  | 4129.80   | 0.05      | 00146 | 00202  | 12355    |
| --SetService                 | 0.01  | 0.20      | 0.20      | 0.01  | 0.22      | 0.22      | 0.01  | 0.26      | 0.26      | 00188 | 00124  | 1        |
| ----generic                  | 0.00  | 0.00      | 0.00      | 0.00  | 0.00      | 0.00      | 0.00  | 0.00      | 0.00      | 00026 | 00010  | 1        |
| --Initialize                 | 0.00  | 9.60      | 0.00      | 0.00  | 9.61      | 0.00      | 0.00  | 9.62      | 0.00      | 00000 | 000193 | 1        |
| ----INITIALIZE               | 0.01  | 9.60      | 0.57      | 0.02  | 9.61      | 0.73      | 0.02  | 9.62      | 0.76      | 00118 | 00060  | 1        |
| ----generic                  | 0.23  | 8.86      | 8.86      | 0.22  | 8.88      | 8.88      | 0.21  | 9.05      | 9.05      | 00060 | 00200  | 1        |
| --Record                     | 0.00  | 0.98      | 0.00      | 0.00  | 1.02      | 0.00      | 0.00  | 1.09      | 0.01      | 00060 | 00105  | 3072     |
| ----generic                  | 0.02  | 0.97      | 0.97      | 0.02  | 1.02      | 1.02      | 0.03  | 1.09      | 1.09      | 00060 | 00214  | 3072     |
| --Run                        | 0.00  | 161.22    | 0.01      | 0.00  | 163.71    | 0.01      | 0.00  | 166.15    | 0.02      | 00157 | 00180  | 4608     |
| ----GenRunMine               | 0.00  | 161.21    | 0.06      | 0.00  | 163.69    | 0.07      | 0.00  | 166.14    | 0.09      | 00060 | 00202  | 4608     |
| ----RUN                      | 0.65  | 161.14    | 25.50     | 0.64  | 163.63    | 26.00     | 0.62  | 166.07    | 26.21     | 00028 | 00207  | 4608     |
| -----AER01                   | 0.00  | 135.20    | 0.09      | 0.00  | 137.63    | 0.11      | 0.00  | 140.10    | 0.14      | 00100 | 00202  | 4608     |
| -----DU                      | 0.02  | 0.92      | 0.92      | 0.03  | 1.06      | 1.06      | 0.03  | 1.42      | 1.42      | 00029 | 00214  | 4608     |
| -----SS                      | 0.20  | 7.88      | 7.88      | 0.19  | 7.94      | 7.94      | 0.19  | 8.05      | 8.05      | 00175 | 00174  | 4608     |
| -----BC                      | 1.20  | 47.00     | 47.00     | 1.20  | 48.91     | 48.91     | 1.22  | 51.80     | 51.80     | 00207 | 00000  | 4608     |
| -----OC                      | 1.58  | 61.66     | 61.66     | 1.51  | 61.68     | 61.68     | 1.46  | 61.68     | 61.68     | 00203 | 00012  | 4608     |
| -----SU                      | 0.41  | 16.12     | 16.12     | 0.42  | 17.00     | 17.00     | 0.46  | 19.32     | 19.32     | 00089 | 00213  | 4608     |
| -----NI                      | 0.02  | 0.87      | 0.87      | 0.02  | 0.94      | 0.94      | 0.03  | 1.22      | 1.22      | 00054 | 00200  | 4608     |
| --Run2                       | 0.00  | 3859.26   | 0.01      | 0.00  | 3897.76   | 0.01      | 0.00  | 3947.32   | 0.02      | 00157 | 00163  | 4608     |
| ----GenRunMine               | 0.00  | 3859.24   | 0.08      | 0.00  | 3897.75   | 0.09      | 0.00  | 3947.31   | 0.11      | 00054 | 00204  | 4608     |
| ----RUN                      | 0.73  | 3859.15   | 28.53     | 0.72  | 3897.65   | 29.48     | 0.74  | 3947.23   | 31.42     | 00077 | 00215  | 4608     |
| -----AER02                   | 0.01  | 3827.73   | 0.22      | 0.01  | 3868.17   | 0.27      | 0.01  | 3918.23   | 0.33      | 00140 | 00202  | 4608     |
| -----CO                      | 1.95  | 76.08     | 76.08     | 2.11  | 86.03     | 86.03     | 2.11  | 89.47     | 89.47     | 00034 | 00207  | 4608     |
| -----CO2                     | 0.05  | 1.98      | 1.98      | 0.06  | 2.32      | 2.32      | 0.06  | 2.70      | 2.70      | 00063 | 00129  | 4608     |
| -----DU                      | 14.66 | 572.93    | 572.93    | 14.91 | 608.15    | 608.15    | 14.88 | 630.09    | 630.09    | 00209 | 00077  | 4608     |
| -----SS                      | 18.38 | 718.27    | 718.27    | 17.93 | 731.56    | 731.56    | 17.61 | 745.95    | 745.95    | 00141 | 00145  | 4608     |
| -----BC                      | 5.28  | 206.57    | 206.57    | 5.69  | 232.11    | 232.11    | 6.04  | 255.71    | 255.71    | 00002 | 00141  | 4608     |
| -----OC                      | 5.26  | 205.45    | 205.45    | 5.40  | 220.37    | 220.37    | 5.66  | 239.94    | 239.94    | 00040 | 00002  | 4608     |
| -----SU                      | 6.99  | 273.05    | 273.05    | 7.21  | 293.97    | 293.97    | 7.14  | 302.39    | 302.39    | 00032 | 00040  | 4608     |
| -----CFC                     | 2.35  | 91.68     | 91.68     | 2.76  | 112.52    | 112.52    | 3.08  | 130.55    | 130.55    | 00092 | 00201  | 4608     |
| -----NI                      | 39.82 | 1556.26   | 1556.26   | 38.76 | 1580.87   | 1580.87   | 38.22 | 1618.81   | 1618.81   | 00173 | 00092  | 4608     |
| --Refresh                    | 0.00  | 0.72      | 0.00      | 0.00  | 0.77      | 0.00      | 0.00  | 0.86      | 0.00      | 00017 | 00131  | 64       |
| ----GenRefreshTot            | 0.00  | 0.72      | 0.00      | 0.00  | 0.77      | 0.00      | 0.00  | 0.86      | 0.00      | 00177 | 00002  | 64       |
| ----GenRefreshMine           | 0.02  | 0.72      | 0.72      | 0.02  | 0.77      | 0.77      | 0.02  | 0.86      | 0.86      | 00060 | 00202  | 64       |
| --Finalize                   | 0.00  | 6.01      | 0.00      | 0.00  | 6.01      | 0.00      | 0.00  | 6.01      | 0.00      | 00159 | 00005  | 1        |
| ----FINALIZE                 | 0.00  | 0.00      | 0.00      | 0.00  | 0.00      | 0.00      | 0.00  | 0.00      | 0.00      | 00080 | 00032  | 1        |
| ----generic                  | 0.15  | 6.01      | 6.01      | 0.15  | 6.01      | 6.01      | 0.14  | 6.01      | 6.01      | 00208 | 00025  | 1        |

## 55. References

English, J. M., Toon, O. B., Mills, M. J., and Yu, F.: Microphysical simulations of new particle formation in the upper troposphere and lower stratosphere, *Atmos. Chem. Phys.*, 11, 9303–9322, <https://doi.org/10.5194/acp-11-9303-2011>, 2011.

Guenther, A. B., Jiang, X., Heald, C. L., Sakulyanontvittaya, T., Duhl, T., Emmons, L. K., and Wang, X.: The Model of Emissions of Gases and Aerosols from Nature version 2.1 (MEGAN2.1): an extended and updated framework for modeling biogenic emissions, *Geosci. Model Dev.*, 5, 1471–1492, <https://doi.org/10.5194/gmd-5-1471-2012>, 2012.

Hodzic, A. and Jimenez, J. L.: Modeling anthropogenically controlled secondary organic aerosols in a megacity: a simplified framework for global and climate models, *Geosci. Model Dev.*, 4, 901–917, <https://doi.org/10.5194/gmd-4-901-2011>, 2011.

Keller, C. A., Long, M. S., Yantosca, R. M., Da Silva, A. M., Pawson, S., and Jacob, D. J.: HEMCO v1.0: a versatile, ESMF-compliant component for calculating emissions in atmospheric models, *Geosci. Model Dev.*, 7, 1409–1417, <https://doi.org/10.5194/gmd-7-1409-2014>, 2014.

Kim, P. S., Jacob, D. J., Fisher, J. A., Travis, K., Yu, K., Zhu, L., Yantosca, R. M., Sulprizio, M. P., Jimenez, J. L., Campuzano-Jost, P., Froyd, K. D., Liao, J., Hair, J. W., Fenn, M. A., Butler, C. F., Wagner, N. L., Gordon, T. D., Welti, A., Wennberg, P. O., Crouse, J. D., Clair, J. M. S., Teng, A. P., Millet, D. B., Schwarz, J. P., Markovic, M. Z., and Perring, A. E.: Sources, seasonality, and trends of southeast US aerosol: an integrated analysis of surface, aircraft, and

satellite observations with the GEOS-Chem chemical transport model, *Atmos Chem Phys*, 15, 10411–10433, <https://doi.org/10.5194/acp-15-10411-2015>, 2015.

Nielsen, J., Pawson, S., Molod, A., Auer, B., da Silva, A., Douglass, A., Duncan, B., Liang, Q., Manyin, M., Oman, L., Putman, W., Strahan, S., and Wargan, K.: Chemical Mechanisms and Their Applications in the Goddard Earth Observing System (GEOS) Earth System Model, *J. Adv. Model. Earth Syst.*, 9, 3019–3044, <https://doi.org/10.1002/2017MS001011>, 2017.

Sander, S. P., J. Abbatt, J. R. Barker, J. B. Burkholder, R. R. Friedl, D. M. Golden, R. E. Huie, C. E. Kolb, M. J. Kurylo, G. K. Moortgat, V. L. Orkin and P. H. Wine "Chemical Kinetics and Photochemical Data for Use in Atmospheric Studies, Evaluation No. 17," JPL Publication 10-6, Jet Propulsion Laboratory, Pasadena, 2011 <http://jpldataeval.jpl.nasa.gov>.
